# Supplementary material for: Periphery TH/TS ratio and TP53 mutation predict the efficacy of ICI-based therapy in advanced non-small cell lung cancer with high PD-L1 expression
Source: Research Square preprint supplement (doi:10.21203/rs.3.rs-6915095/v1), 2025-08-08
Supplement: Supplementary file 1 [file 101905160184d8aff2b28742.pdf]

Table1. Baseline clinicopathological information between DCB and NDB groups.

| Variables                         | DCB (n=72) | NDB (n=47) |
|-----------------------------------|------------|------------|
| Age (years)                       | 65.54±7.37 | 68.68±8.63 |
| Gender                            |            |            |
| Female                            | 25 (34.7%) | 18 (38.3%) |
| Male                              | 47 (65.3%) | 29 (61.7%) |
| Pathology                         |            |            |
| Adenocarcinoma                    | 42 (58.3%) | 21 (44.7%) |
| Squamous cell carcinoma           | 26 (36.1%) | 18 (38.3%) |
| Sarcomatoid carcinoma             | 4 (5.6%)   | 5 (10.6%)  |
| Poor differentiated carcinoma     | 0 (0.0%)   | 3 (6.4%)   |
| Multiple primary carcinoma        |            |            |
| Yes                               | 11         | 14         |
| No                                | 61         | 33         |
| Smoking history                   |            |            |
| Yes                               | 59         | 31         |
| No                                | 13         | 16         |
| Family history of cancer          |            |            |
| Yes                               | 19         | 17         |
| No                                | 53         | 30         |
| ECOG PS                           |            |            |
| 0-1                               | 72 (100%)  | 38 (80.9%) |
| 2                                 | 0 (0.0%)   | 9 (19.1%)  |
| TMB                               |            |            |
| <10/MB                            | 23 (31.9%) | 31 (66.0%) |
| 10-19/MB                          | 29 (40.3%) | 11 (23.4%) |
| ≥20/MB                            | 20 (27.8%) | 5 (10.6%)  |
| PD-L1                             |            |            |
| 50-74%                            | 40 (55.6%) | 28 (59.6%) |
| 75-100%                           | 32 (44.4%) | 19 (40.4%) |
| Treatment                         |            |            |
| ICI                               | 11 (15.3%) | 14 (29.8%) |
| Chemotherapy+ICI                  | 54 (75.0%) | 31 (66.0%) |
| Chemotherapy+ICI+antiangiogenesis | 7 (9.7%)   | 2 (4.2%)   |
| Best overall response             |            |            |
| CR                                | 25 (34.7%) | 0 (0.0%)   |
| PR                                | 31 (43.1%) | 6 (12.8%)  |
| SD                                | 16 (22.2%) | 19 (40.4%) |
| PD                                | 0 (0.0%)   | 16 (34.0%) |
| ED                                | 0 (0.0%)   | 6 (12.8%)  |
| Tumor response rate               |            |            |
| ORR                               | 56 (77.8%) | 6 (12.8%)  |
| DCR                               | 72 (100%)  | 25 (53.2%) |

DCB: durable clinical benefit; NDB: no durable benefit; ECOG: eastern cooperative oncology

group; PS: performance status score; TMB: tumor mutation burden; PD-L1, programmed cell death ligand 1; ICI: immune checkpoint inhibitor; CR: complete response; PR: partial response; SD: stable disease; PD: progressive disease; ED: early death; ORR, overall response rate; DCR, diseased control rate;  $ORR = (CR + PR) / (CR + PR + SD + PD) * 100(\%)$ ;  $DCR = (CR + PR + SD) / (CR + PR + SD + PD) * 100(\%)$ ; TH: helper T cells; TS: suppressor T cells.

Table 2. Counts of baseline lymphocyte subsets in DCB and NDB groups.

| Lymphocyte subsets (cells/ $\mu$ L) | DCB (n=72)        | NDB (n=47)        | <i>p</i> value |
|-------------------------------------|-------------------|-------------------|----------------|
| Total lymphocyte                    | 1638 $\pm$ 739.19 | 1356 $\pm$ 634.03 | 0.3803         |
| Total T cell                        | 1167 $\pm$ 577.02 | 978 $\pm$ 480.61  | 0.2962         |
| CD4+ T cell                         | 768 $\pm$ 415.26  | 468 $\pm$ 223.31  | 0.0006         |
| CD8+ T cell                         | 359 $\pm$ 195.48  | 470 $\pm$ 324.18  | 0.0043         |
| Total B cell                        | 122 $\pm$ 77.84   | 110 $\pm$ 67.20   | 0.4008         |
| NK cell                             | 312 $\pm$ 180.95  | 254 $\pm$ 175.81  | 0.8698         |
| TH/TS ratio                         | 2.24 $\pm$ 0.75   | 1.17 $\pm$ 0.43   | 0.0018         |

Table 3. Comparison of circulating lymphocyte subpopulations after disease progression in DCB and NDB groups

| Lymphocyte subsets      | DCB(55)               |                | NDB(41)               |                       |
|-------------------------|-----------------------|----------------|-----------------------|-----------------------|
|                         | Count(cells/ $\mu$ L) | <i>p</i> value | Count(cells/ $\mu$ L) | <i>p</i> value        |
| Total lymphocyte        | 1633 $\pm$ 764.14     | vs 0.8831      | 1378 $\pm$ 631.51     | vs 1606 $\pm$ 868.17  |
| (1 <sup>st</sup> vs PD) | 1655 $\pm$ 770.43     |                |                       |                       |
| Total T cell            | 1176 $\pm$ 601.38     | vs 0.9755      | 993 $\pm$ 484.08      | vs 1125 $\pm$ 591.26  |
| (1 <sup>st</sup> vs PD) | 1172 $\pm$ 559.44     |                |                       |                       |
| CD4+ T cell             | 770 $\pm$ 435.75      | vs 0.5626      | 464 $\pm$ 201.12      | vs 454 $\pm$ 264.06   |
| (1 <sup>st</sup> vs PD) | 721 $\pm$ 341.18      |                |                       |                       |
| CD8+ T cell             | 364 $\pm$ 204.19      | vs 0.3300      | 485 $\pm$ 339.01      | vs 607 $\pm$ 358.10   |
| (1 <sup>st</sup> vs PD) | 403 $\pm$ 205.04      |                |                       |                       |
| Total B cell            | 125 $\pm$ 81.80       | vs 113 0.4921  | 108 $\pm$ 65.11       | vs 125 $\pm$ 150.15   |
| (1 <sup>st</sup> vs PD) | $\pm$ 91.42           |                |                       |                       |
| NK cell                 | 295 $\pm$ 164.03      | vs 0.3354      | 262 $\pm$ 181.51      | vs 279 $\pm$ 167.69   |
| (1 <sup>st</sup> vs PD) | 336 $\pm$ 246.82      |                |                       |                       |
| TH/TS ratio             | 2.21 $\pm$ 0.78       | vs 1.88 0.0006 | 1.15 $\pm$ 0.40       | vs 0.86 $\pm$ <0.0001 |
| (1 <sup>st</sup> vs PD) | $\pm$ 0.60            |                | 0.44                  |                       |

Figure 1. Flowchart of patient selection

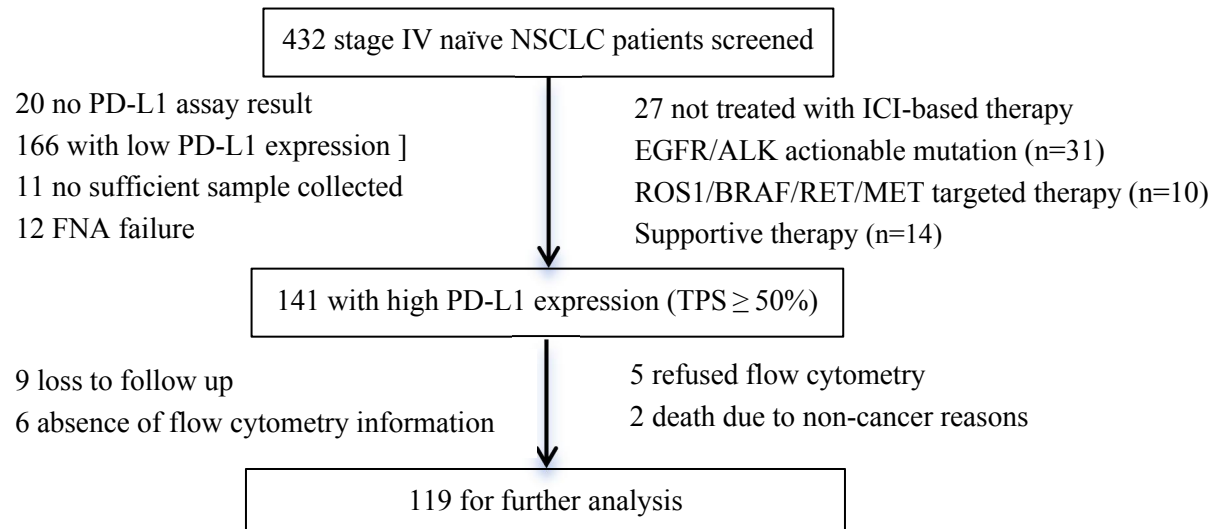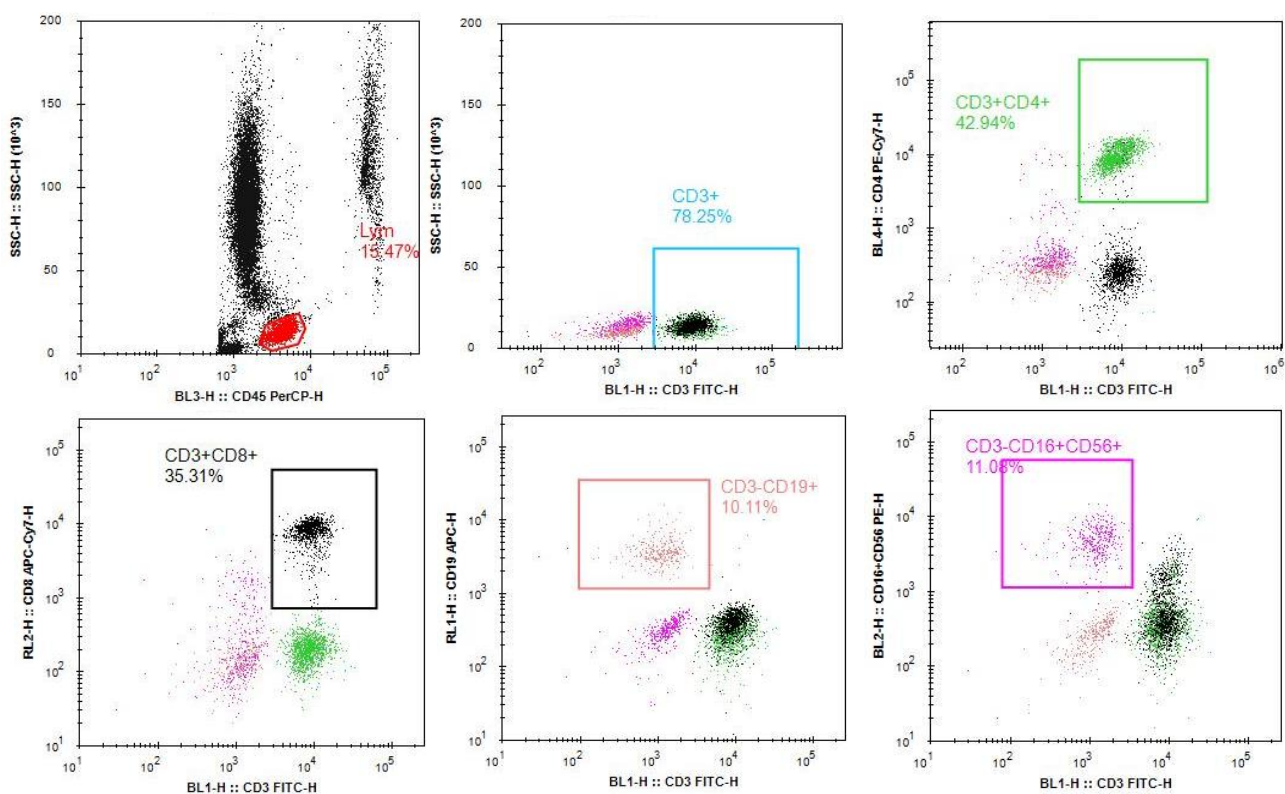

Figure 2. The circulating lymphocyte subsets determined using six-color flow cytometry, including T lymphocytes (CD3+), CD4+ T cells (CD3+CD4+), CD8+ T cells (CD3+CD8+), B lymphocytes (CD3-CD19+), natural killer cells (NK cells, CD3-CD16+CD56+).

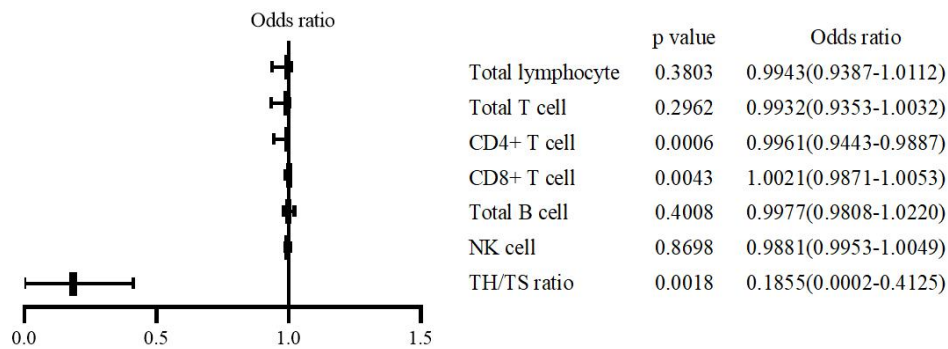

Figure 3. The logistic regression of baseline circulating lymphocyte subsets to predict objective response.

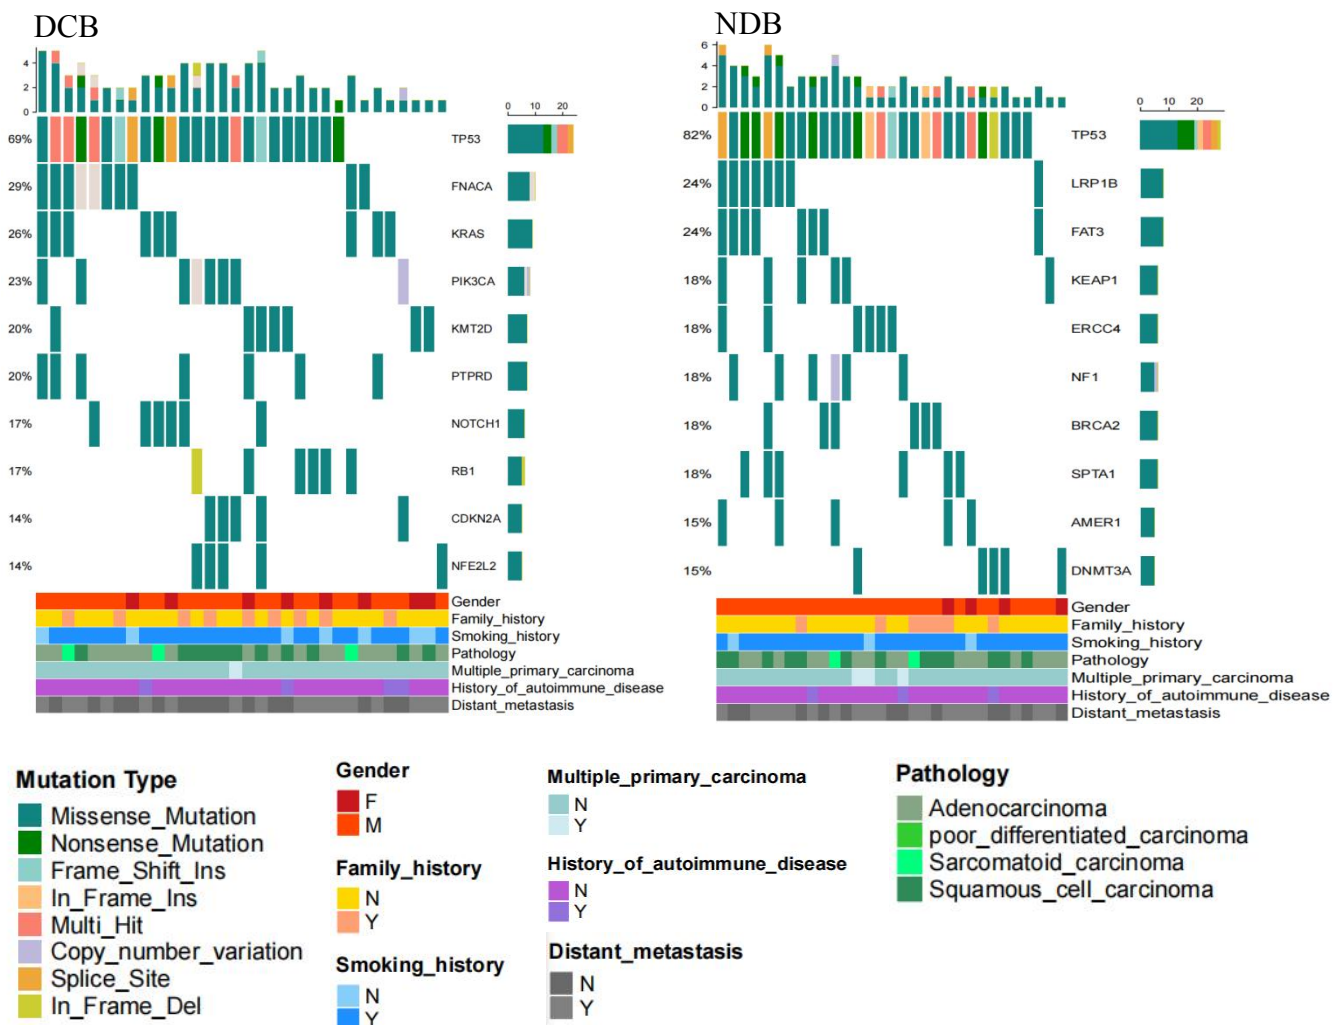

Figure 4. The top 10 genes detected by pre-treated NGS in both DCB and NDB groups. The prevalence of alterations were listed on the right; mutation counts were exhibited at the top; medical records of patients were shown on the bottom.

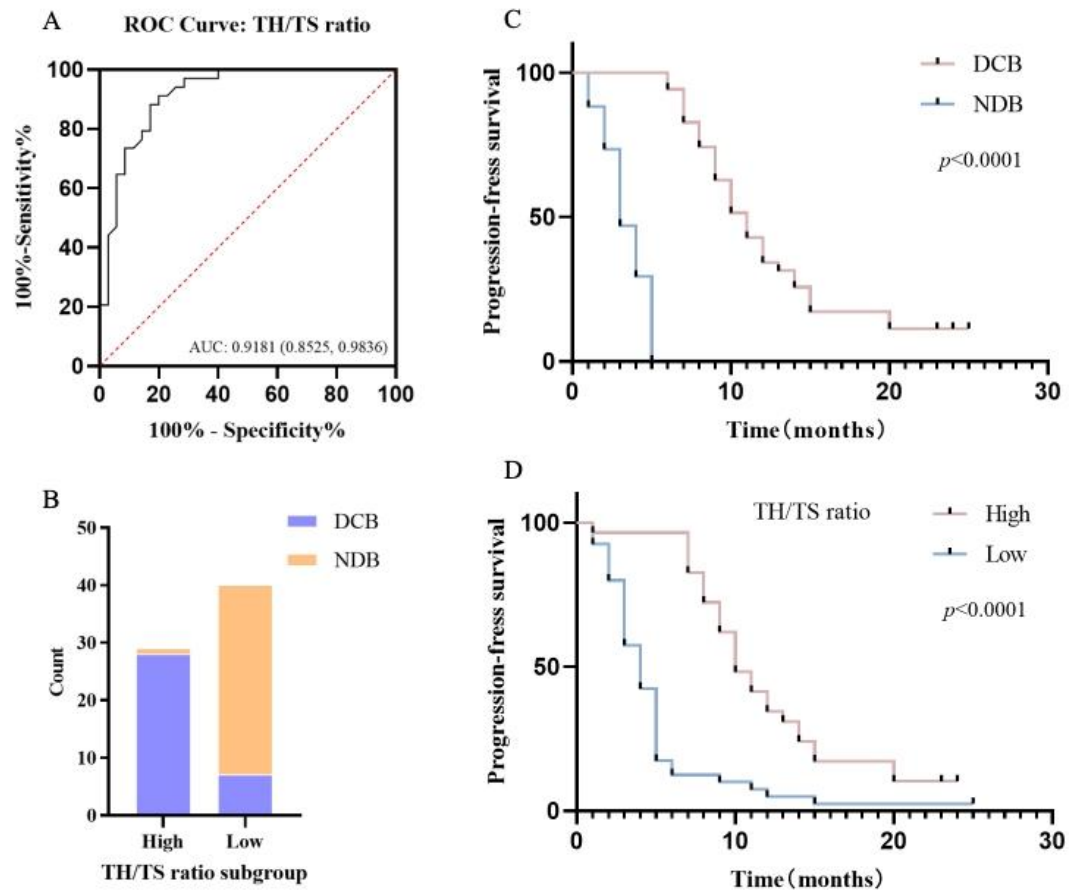

Figure 5. The ROC curve of baseline TH/TS ratio to predict therapeutic efficacy (A). The value of TH/TS cut-off-point to distinguish patients between DCB and NDB groups (B). Kaplan-Meier survival curve for PFS in DCB and NDB groups (C). Kaplan-Meier survival curve for PFS between different value of TH/TS subgroups (High: TH/TS  $\geq 1.735$ ; Low: TH/TS  $< 1.735$ ) (D).

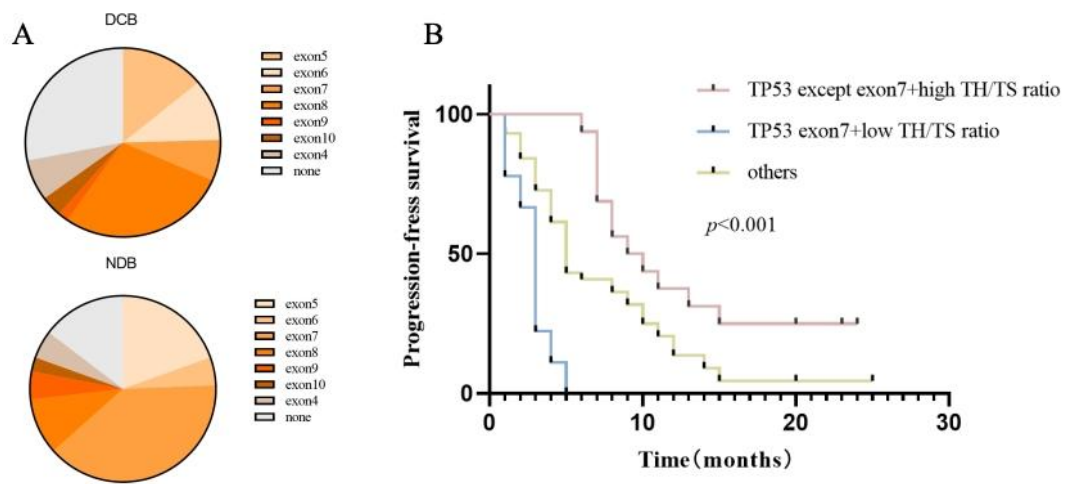

Figure 6. The distribution of TP53 variants in DCB and NDB groups (A). Kaplan-Meier survival curve for PFS between different TP53 mutations and TH/TS subgroups (B).
